# Supplementary material for: Assessing the storm surge model performance: What error indicators can measure the skill?
Source: Copernicus journal article supplement (doi:10.5194/egusphere-2024-1415), 2024-05-22
Supplement: Supplementary file 1 [file egusphere-2024-1415-supplement-version2.zip]

# Assessing the storm surge model performance: What error indicators can measure the skill?

Rodrigo Campos-Caba<sup>1</sup>, Lorenzo Mentaschi<sup>1</sup>, Jacopo Alessandri<sup>1</sup>, Paula Camus<sup>2</sup>, Andrea Mazzino<sup>3</sup>,  
5 Francesco Ferrari<sup>3</sup>, Ivan Federico<sup>4</sup>, Michalis Vousdoukas<sup>5</sup>, and Massimo Tondello<sup>6</sup>

<sup>1</sup>Department of Physics and Astronomy, University of Bologna, Bologna, Italy

<sup>2</sup>Departamento de Ciencias y Técnicas del Agua y del Medio Ambiente, University of Cantabria, Santander, Spain

<sup>3</sup>Department of Civil, Chemical and Environmental Engineering, University of Genoa, Genoa, Italy

<sup>4</sup>Centro Euro-Mediterraneo sui Cambiamenti Climatici – Ocean Predictions and Applications, Lecce, Italy

10 <sup>5</sup>Joint Research Centre, European Commission, Seville, Spain

<sup>6</sup>HS Marine Srl, Noventa Padovana, Italy

Correspondence to: Rodrigo Campos-Caba (rodrigo.camposcaba@unibo.it)

## SUPPLEMENTARY MATERIAL

15

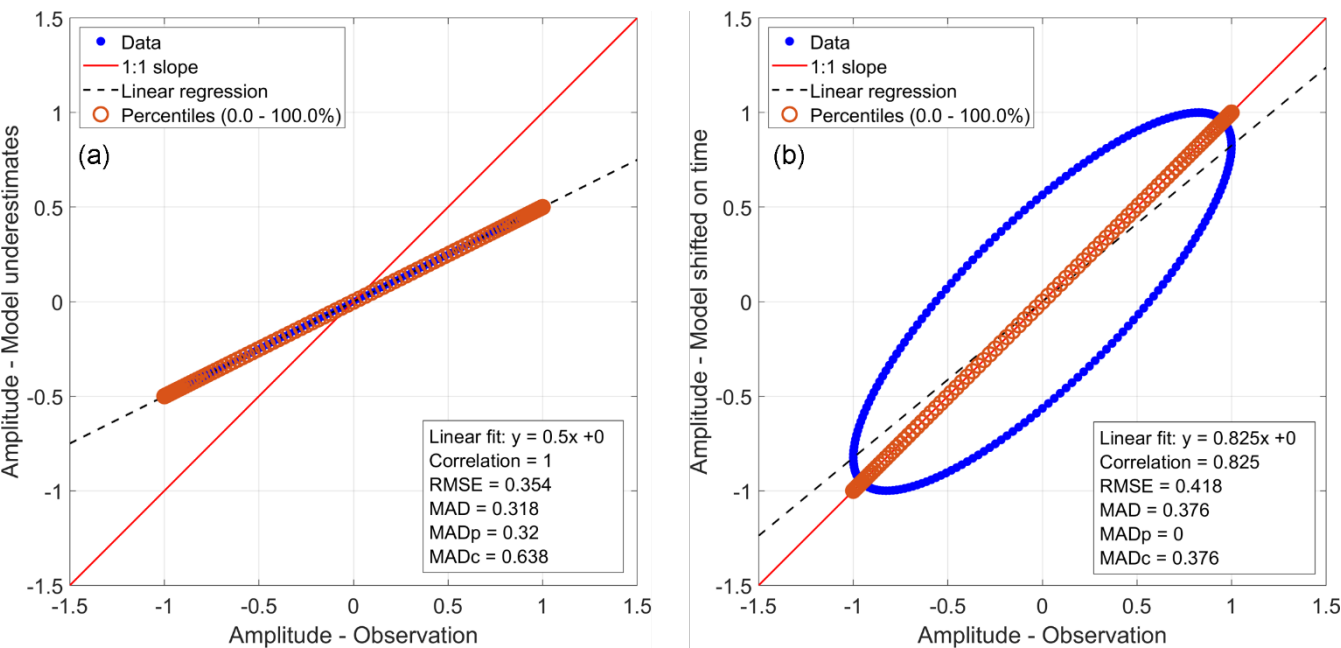

Figure 1S: Scatter plots and metrics for the validation of the proposed metrics, MADp and MADc. (a) Observation vs model with half amplitude and same phase; (b) Observation vs model with same amplitude and phase shifted.

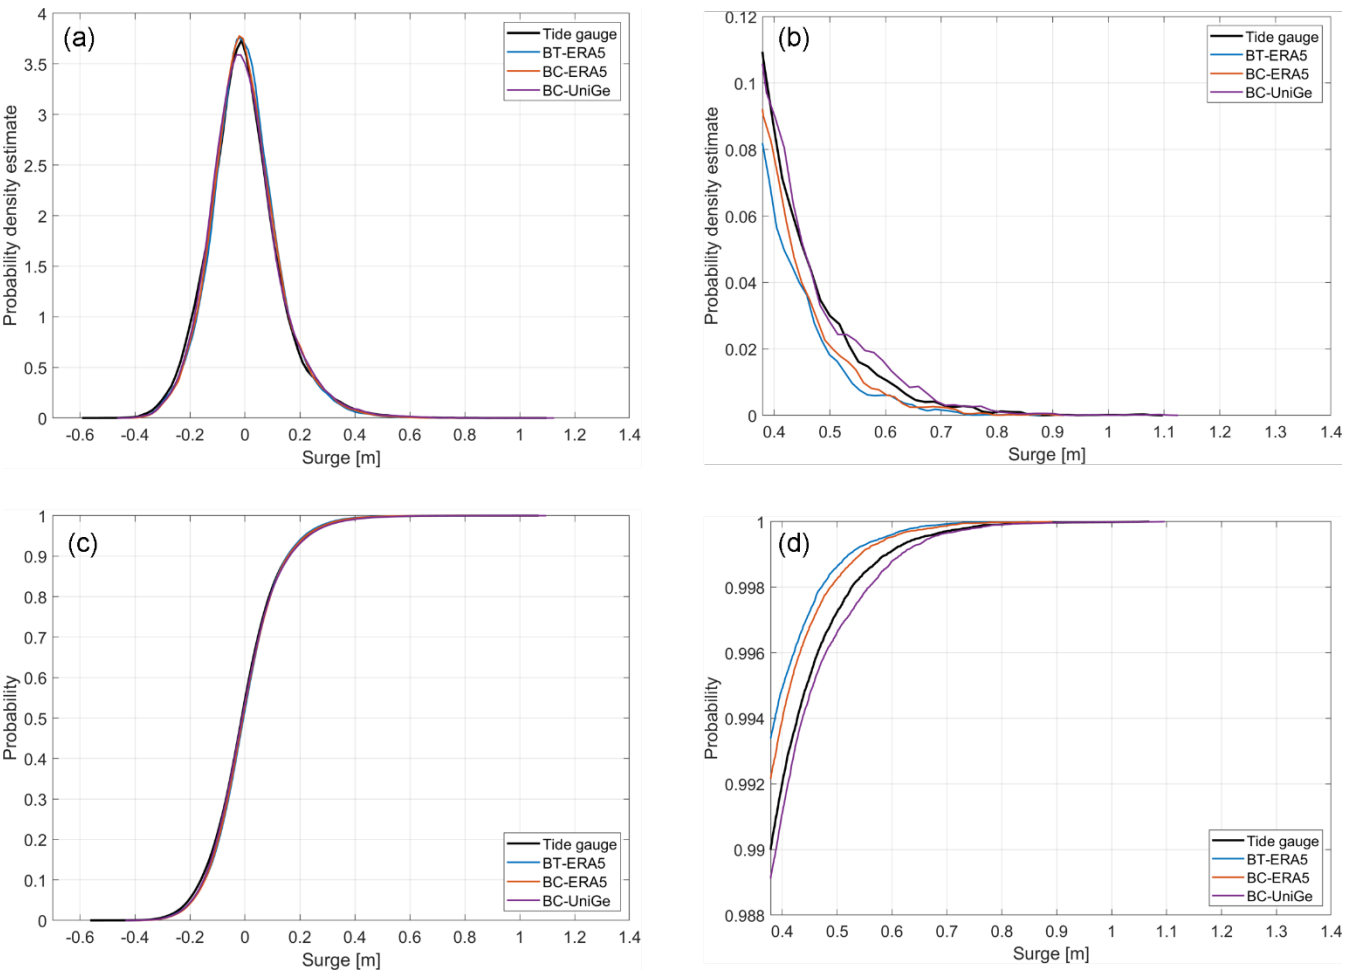

**Figure 2S: Probability Density Estimates (PDE) and Empirical Cumulative Distribution Function (ECDF), CNR platform. (a) PDE for the total amount of data; (b) PDE for values above 99th percentile of the observed data; (c) ECDF for the total amount of data; (d) ECDF for values above the 99th percentile of the observed data.**

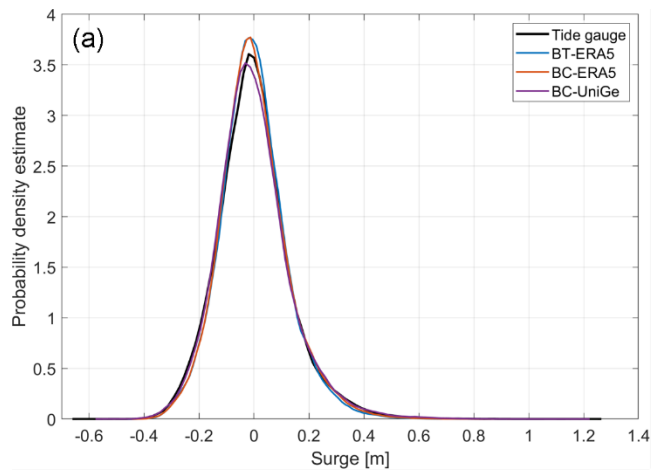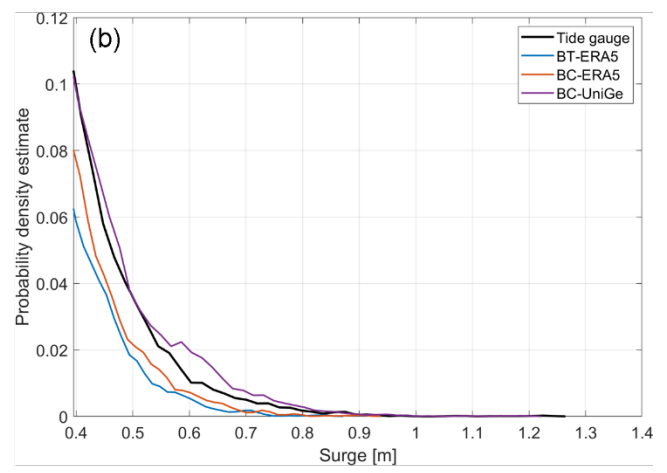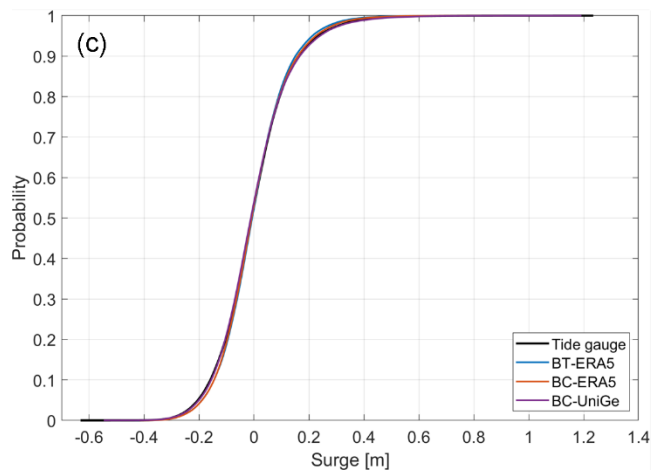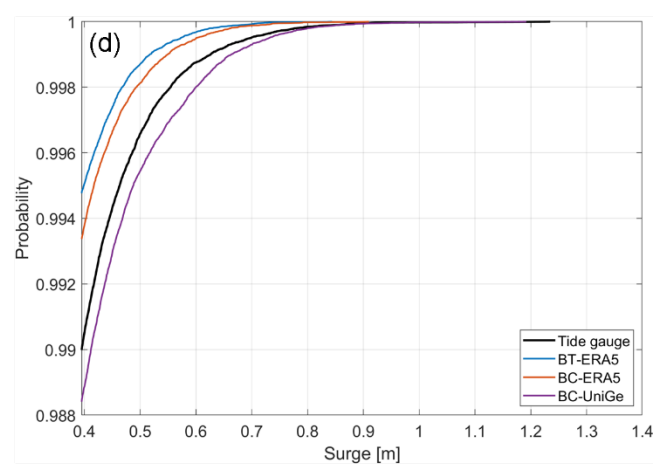

**Figure 3S: Probability Density Estimates (PDE) and Empirical Cumulative Distribution Function (ECDF), Punta della Salute. (a) PDE for the total amount of data; (b) PDE for values above 99th percentile of the observed data; (c) ECDF for the total amount of data; (d) ECDF for values above the 99th percentile of the observed data.**

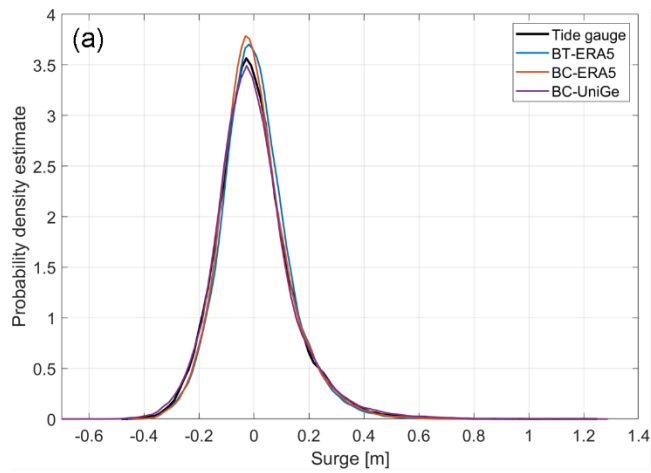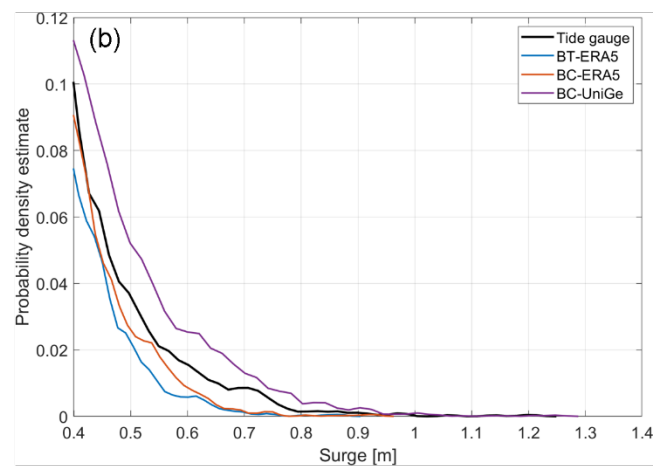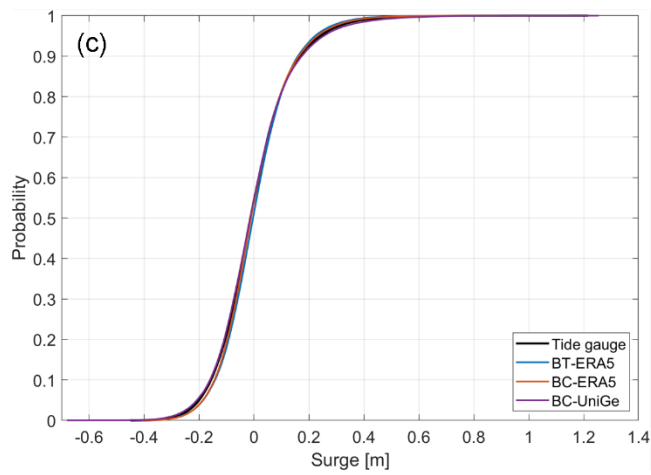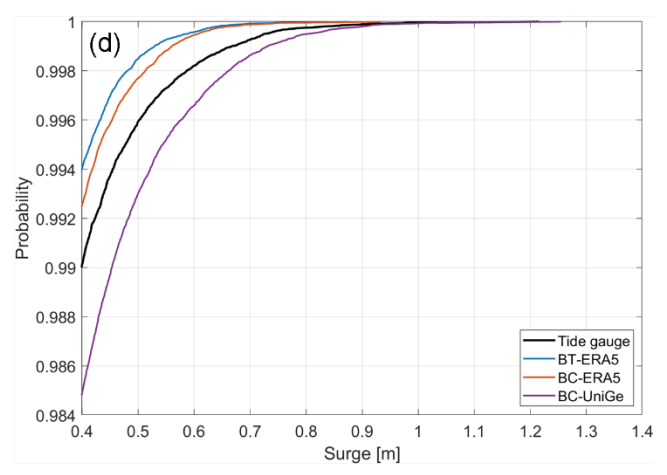

**Figure 4S: Probability Density Estimates (PDE) and Empirical Cumulative Distribution Function (ECDF), Caorle. (a) PDE for the total amount of data; (b) PDE for values above 99th percentile of the observed data; (c) ECDF for the total amount of data; (d) ECDF for values above the 99th percentile of the observed data.**

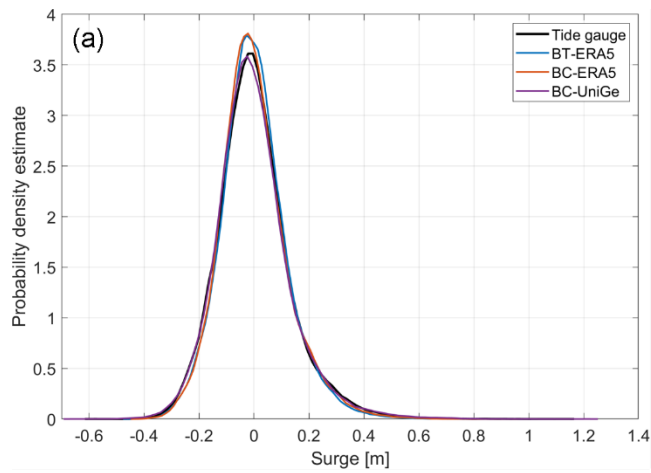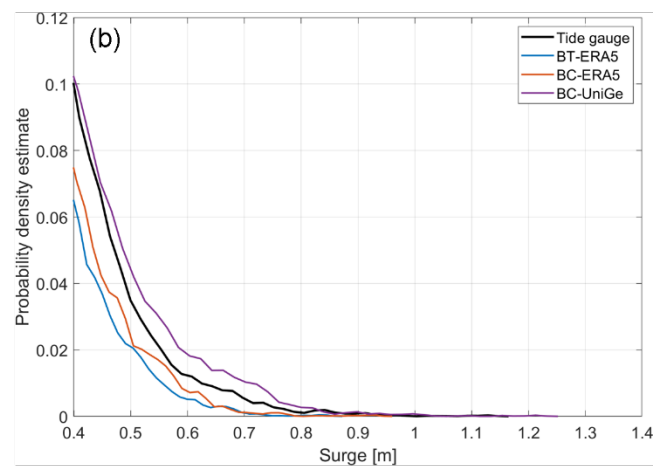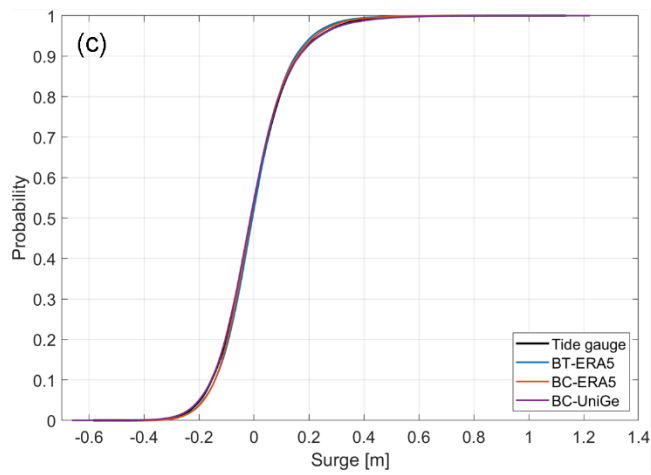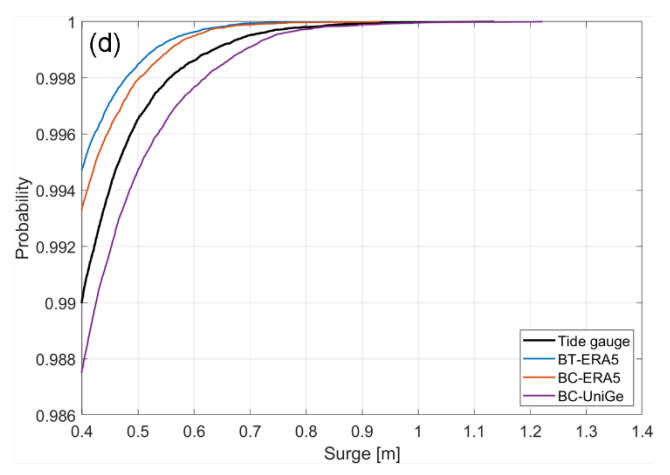

**Figure 5S: Probability Density Estimates (PDE) and Empirical Cumulative Distribution Function (ECDF), Grado. (a) PDE for the total amount of data; (b) PDE for values above 99th percentile of the observed data; (c) ECDF for the total amount of data; (d) ECDF for values above the 99th percentile of the observed data.**

65

70

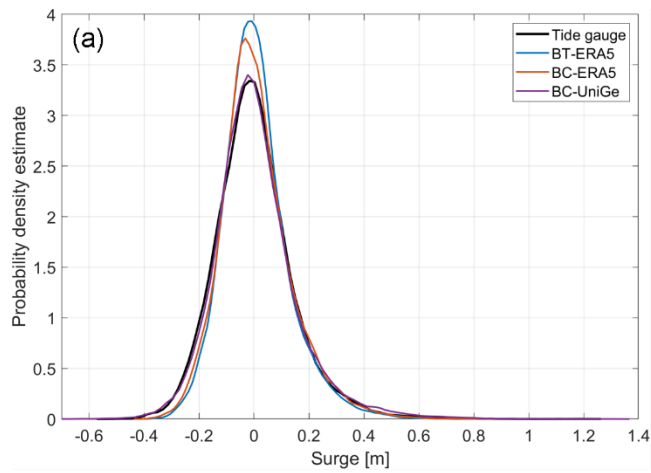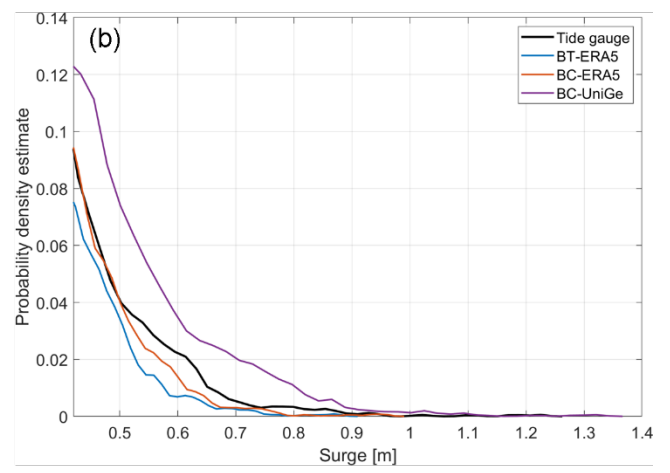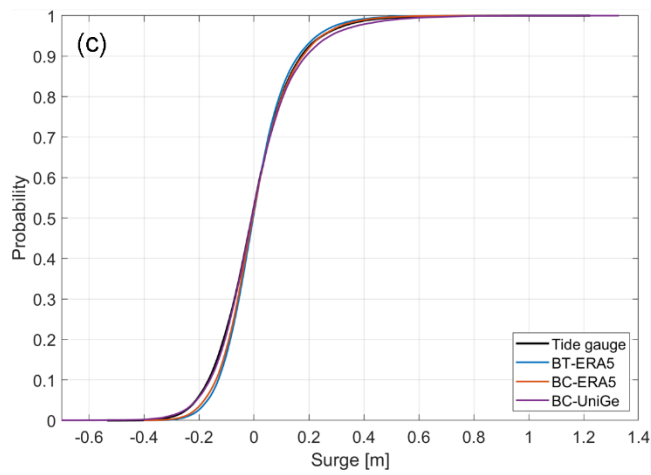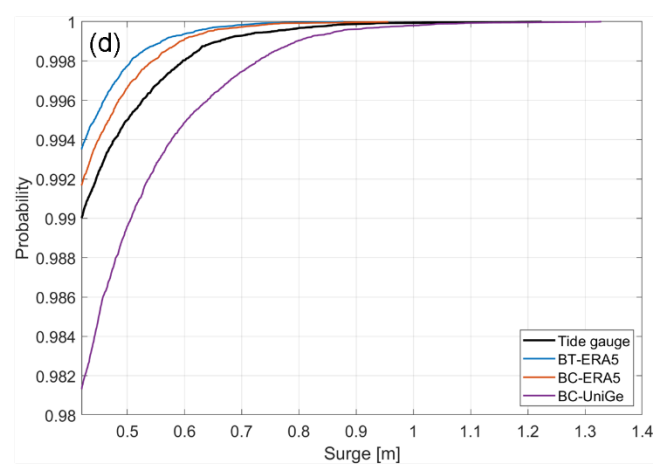

**Figure 6S: Probability Density Estimates (PDE) and Empirical Cumulative Distribution Function (ECDF), Monfalcone. (a) PDE for the total amount of data; (b) PDE for values above 99th percentile of the observed data; (c) ECDF for the total amount of data; (d) ECDF for values above the 99th percentile of the observed data.**

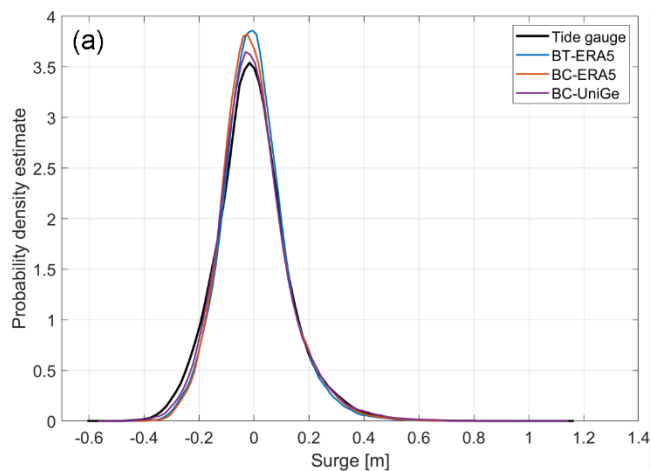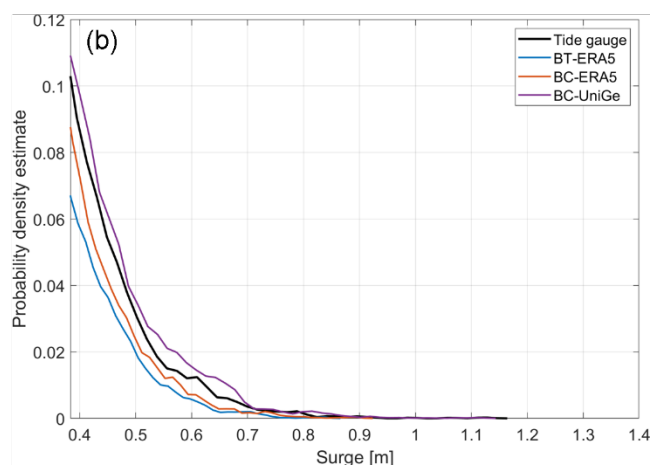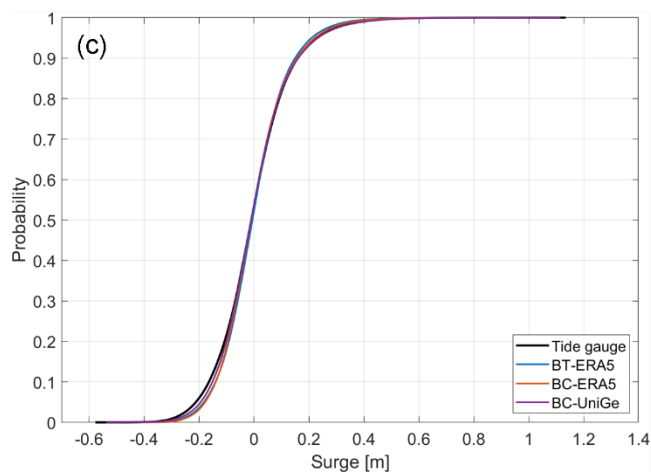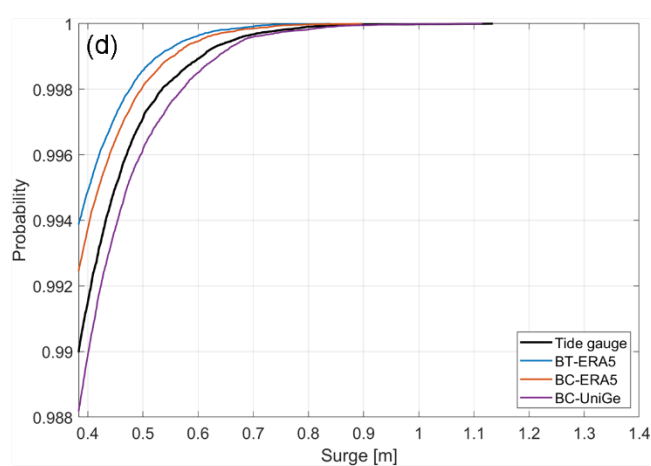

**Figure 7S: Probability Density Estimates (PDE) and Empirical Cumulative Distribution Function (ECDF), Trieste. (a) PDE for the total amount of data; (b) PDE for values above 99th percentile of the observed data; (c) ECDF for the total amount of data; (d) ECDF for values above the 99th percentile of the observed data.**
